# Supplementary material
Source: ML conference proceedings conference paper supplement (https://proceedings.neurips.cc/paper_files/paper/2022/hash/1f14ac136d55c34a18a04ce3db083599-Abstract.html)
Supplement: Supplementary file 1 [file 1f14ac136d55c34a18a04ce3db083599-Supplemental-Conference.zip]

Archive with 246 entries (233 files):
- neurips-supplementary/
- __MACOSX/._neurips-supplementary
- neurips-supplementary/.DS_Store
- __MACOSX/neurips-supplementary/._.DS_Store
- neurips-supplementary/code/
- __MACOSX/neurips-supplementary/._code
- neurips-supplementary/appendices.pdf
- __MACOSX/neurips-supplementary/._appendices.pdf
- neurips-supplementary/code/requirements.txt
- __MACOSX/neurips-supplementary/code/._requirements.txt
- neurips-supplementary/code/tests/
- __MACOSX/neurips-supplementary/code/._tests
- neurips-supplementary/code/looprl/
- __MACOSX/neurips-supplementary/code/._looprl
- neurips-supplementary/code/README.md
- __MACOSX/neurips-supplementary/code/._README.md
- neurips-supplementary/code/dune-project
- __MACOSX/neurips-supplementary/code/._dune-project
- neurips-supplementary/code/.gitignore
- __MACOSX/neurips-supplementary/code/._.gitignore
- neurips-supplementary/code/benchmarks/
- __MACOSX/neurips-supplementary/code/._benchmarks
- neurips-supplementary/code/looprl_lib/
- __MACOSX/neurips-supplementary/code/._looprl_lib
- neurips-supplementary/code/clean.sh
- __MACOSX/neurips-supplementary/code/._clean.sh
- neurips-supplementary/code/tests/test_spec_matches.py
- __MACOSX/neurips-supplementary/code/tests/._test_spec_matches.py
- neurips-supplementary/code/tests/test_solver_mcts.py
- __MACOSX/neurips-supplementary/code/tests/._test_solver_mcts.py
- neurips-supplementary/code/tests/test_network.py
- __MACOSX/neurips-supplementary/code/tests/._test_network.py
- neurips-supplementary/code/tests/test_random_walk.py
- __MACOSX/neurips-supplementary/code/tests/._test_random_walk.py
- neurips-supplementary/code/tests/test_events.py
- __MACOSX/neurips-supplementary/code/tests/._test_events.py
- neurips-supplementary/code/looprl/arith.ml
- __MACOSX/neurips-supplementary/code/looprl/._arith.ml
- neurips-supplementary/code/looprl/search.ml
- __MACOSX/neurips-supplementary/code/looprl/._search.ml
- neurips-supplementary/code/looprl/teacher.mli
- __MACOSX/neurips-supplementary/code/looprl/._teacher.mli
- neurips-supplementary/code/looprl/python.ml
- __MACOSX/neurips-supplementary/code/looprl/._python.ml
- neurips-supplementary/code/looprl/lexer.ml
- __MACOSX/neurips-supplementary/code/looprl/._lexer.ml
- neurips-supplementary/code/looprl/formula_util.ml
- __MACOSX/neurips-supplementary/code/looprl/._formula_util.ml
- neurips-supplementary/code/looprl/prog_tests.ml
- __MACOSX/neurips-supplementary/code/looprl/._prog_tests.ml
- neurips-supplementary/code/looprl/static_analysis.mli
- __MACOSX/neurips-supplementary/code/looprl/._static_analysis.mli
- neurips-supplementary/code/looprl/solver.mli
- __MACOSX/neurips-supplementary/code/looprl/._solver.mli
- neurips-supplementary/code/looprl/search_intf.ml
- __MACOSX/neurips-supplementary/code/looprl/._search_intf.ml
- neurips-supplementary/code/looprl/util/
- __MACOSX/neurips-supplementary/code/looprl/._util
- neurips-supplementary/code/looprl/bin/
- __MACOSX/neurips-supplementary/code/looprl/._bin
- neurips-supplementary/code/looprl/var.ml
- __MACOSX/neurips-supplementary/code/looprl/._var.ml
- neurips-supplementary/code/looprl/python/
- __MACOSX/neurips-supplementary/code/looprl/._python
- neurips-supplementary/code/looprl/dune
- __MACOSX/neurips-supplementary/code/looprl/._dune
- neurips-supplementary/code/looprl/python.mli
- __MACOSX/neurips-supplementary/code/looprl/._python.mli
- neurips-supplementary/code/looprl/var.mli
- __MACOSX/neurips-supplementary/code/looprl/._var.mli
- neurips-supplementary/code/looprl/formula.mli
- __MACOSX/neurips-supplementary/code/looprl/._formula.mli
- neurips-supplementary/code/looprl/term.mli
- __MACOSX/neurips-supplementary/code/looprl/._term.mli
- neurips-supplementary/code/looprl/tokenize.ml
- __MACOSX/neurips-supplementary/code/looprl/._tokenize.ml
- neurips-supplementary/code/looprl/static_analysis.ml
- __MACOSX/neurips-supplementary/code/looprl/._static_analysis.ml
- neurips-supplementary/code/looprl/arith.mli
- __MACOSX/neurips-supplementary/code/looprl/._arith.mli
- neurips-supplementary/code/looprl/formula_util.mli
- __MACOSX/neurips-supplementary/code/looprl/._formula_util.mli
- neurips-supplementary/code/looprl/search.mli
- __MACOSX/neurips-supplementary/code/looprl/._search.mli
- neurips-supplementary/code/looprl/parse.ml
- __MACOSX/neurips-supplementary/code/looprl/._parse.ml
- neurips-supplementary/code/looprl/prog.mli
- __MACOSX/neurips-supplementary/code/looprl/._prog.mli
- neurips-supplementary/code/looprl/formula.ml
- __MACOSX/neurips-supplementary/code/looprl/._formula.ml
- neurips-supplementary/code/looprl/solver.ml
- __MACOSX/neurips-supplementary/code/looprl/._solver.ml
- neurips-supplementary/code/looprl/teacher.ml
- __MACOSX/neurips-supplementary/code/looprl/._teacher.ml
- neurips-supplementary/code/looprl/prog.ml
- __MACOSX/neurips-supplementary/code/looprl/._prog.ml
- neurips-supplementary/code/looprl/token.ml
- __MACOSX/neurips-supplementary/code/looprl/._token.ml
- neurips-supplementary/code/looprl/pretraining.ml
- __MACOSX/neurips-supplementary/code/looprl/._pretraining.ml
- neurips-supplementary/code/looprl/token_graph.ml
- __MACOSX/neurips-supplementary/code/looprl/._token_graph.ml
- neurips-supplementary/code/looprl/tensorize.ml
- __MACOSX/neurips-supplementary/code/looprl/._tensorize.ml
- neurips-supplementary/code/looprl/prog_util.mli
- __MACOSX/neurips-supplementary/code/looprl/._prog_util.mli
- neurips-supplementary/code/looprl/parser.mly
- __MACOSX/neurips-supplementary/code/looprl/._parser.mly
- neurips-supplementary/code/looprl/tensorize.mli
- __MACOSX/neurips-supplementary/code/looprl/._tensorize.mli
- neurips-supplementary/code/looprl/event_intf.ml
- __MACOSX/neurips-supplementary/code/looprl/._event_intf.ml
- neurips-supplementary/code/looprl/graphable.ml
- __MACOSX/neurips-supplementary/code/looprl/._graphable.ml
- neurips-supplementary/code/looprl/pretraining.mli
- __MACOSX/neurips-supplementary/code/looprl/._pretraining.mli
- neurips-supplementary/code/looprl/token_graph.mli
- __MACOSX/neurips-supplementary/code/looprl/._token_graph.mli
- neurips-supplementary/code/looprl/tokenize.mli
- __MACOSX/neurips-supplementary/code/looprl/._tokenize.mli
- neurips-supplementary/code/looprl/term.ml
- __MACOSX/neurips-supplementary/code/looprl/._term.ml
- neurips-supplementary/code/looprl/prog_util.ml
- __MACOSX/neurips-supplementary/code/looprl/._prog_util.ml
- neurips-supplementary/code/looprl/parse.mli
- __MACOSX/neurips-supplementary/code/looprl/._parse.mli
- neurips-supplementary/code/benchmarks/code2inv/
- __MACOSX/neurips-supplementary/code/benchmarks/._code2inv
- neurips-supplementary/code/looprl_lib/dgt.py
- __MACOSX/neurips-supplementary/code/looprl_lib/._dgt.py
- neurips-supplementary/code/looprl_lib/disk_recorder.py
- __MACOSX/neurips-supplementary/code/looprl_lib/._disk_recorder.py
- neurips-supplementary/code/looprl_lib/params.py
- __MACOSX/neurips-supplementary/code/looprl_lib/._params.py
- neurips-supplementary/code/looprl_lib/pretraining.py
- __MACOSX/neurips-supplementary/code/looprl_lib/._pretraining.py
- neurips-supplementary/code/looprl_lib/prettify.py
- __MACOSX/neurips-supplementary/code/looprl_lib/._prettify.py
- neurips-supplementary/code/looprl_lib/models.py
- __MACOSX/neurips-supplementary/code/looprl_lib/._models.py
- neurips-supplementary/code/looprl_lib/param_util.py
- __MACOSX/neurips-supplementary/code/looprl_lib/._param_util.py
- neurips-supplementary/code/looprl_lib/util.py
- __MACOSX/neurips-supplementary/code/looprl_lib/._util.py
- neurips-supplementary/code/looprl_lib/explore_tree.py
- __MACOSX/neurips-supplementary/code/looprl_lib/._explore_tree.py
- neurips-supplementary/code/looprl_lib/events.py
- __MACOSX/neurips-supplementary/code/looprl_lib/._events.py
- neurips-supplementary/code/looprl_lib/experiments/
- __MACOSX/neurips-supplementary/code/looprl_lib/._experiments
- neurips-supplementary/code/looprl_lib/training/
- __MACOSX/neurips-supplementary/code/looprl_lib/._training
- neurips-supplementary/code/looprl_lib/tensors.py
- __MACOSX/neurips-supplementary/code/looprl_lib/._tensors.py
- neurips-supplementary/code/looprl_lib/__init__.py
- __MACOSX/neurips-supplementary/code/looprl_lib/.___init__.py
- neurips-supplementary/code/looprl_lib/net_util.py
- __MACOSX/neurips-supplementary/code/looprl_lib/._net_util.py
- neurips-supplementary/code/looprl_lib/pp_table.py
- __MACOSX/neurips-supplementary/code/looprl_lib/._pp_table.py
- neurips-supplementary/code/looprl_lib/self_play.py
- __MACOSX/neurips-supplementary/code/looprl_lib/._self_play.py
- neurips-supplementary/code/looprl_lib/cli.py
- __MACOSX/neurips-supplementary/code/looprl_lib/._cli.py
- neurips-supplementary/code/looprl_lib/examples.py
- __MACOSX/neurips-supplementary/code/looprl_lib/._examples.py
- neurips-supplementary/code/looprl_lib/inference.py
- __MACOSX/neurips-supplementary/code/looprl_lib/._inference.py
- neurips-supplementary/code/looprl_lib/progress_bar.py
- __MACOSX/neurips-supplementary/code/looprl_lib/._progress_bar.py
- neurips-supplementary/code/looprl_lib/env_wrapper.py
- __MACOSX/neurips-supplementary/code/looprl_lib/._env_wrapper.py
- neurips-supplementary/code/looprl_lib/mcts.py
- __MACOSX/neurips-supplementary/code/looprl_lib/._mcts.py
- neurips-supplementary/code/looprl_lib/samples.py
- __MACOSX/neurips-supplementary/code/looprl_lib/._samples.py
- neurips-supplementary/code/looprl/util/monads.ml
- __MACOSX/neurips-supplementary/code/looprl/util/._monads.ml
- neurips-supplementary/code/looprl/util/combinatorics.ml
- __MACOSX/neurips-supplementary/code/looprl/util/._combinatorics.ml
- neurips-supplementary/code/looprl/util/pqueue.mli
- __MACOSX/neurips-supplementary/code/looprl/util/._pqueue.mli
- neurips-supplementary/code/looprl/util/dune
- __MACOSX/neurips-supplementary/code/looprl/util/._dune
- neurips-supplementary/code/looprl/util/names.ml
- __MACOSX/neurips-supplementary/code/looprl/util/._names.ml
- neurips-supplementary/code/looprl/util/fresh.mli
- __MACOSX/neurips-supplementary/code/looprl/util/._fresh.mli
- neurips-supplementary/code/looprl/util/math.ml
- __MACOSX/neurips-supplementary/code/looprl/util/._math.ml
- neurips-supplementary/code/looprl/util/random.mli
- __MACOSX/neurips-supplementary/code/looprl/util/._random.mli
- neurips-supplementary/code/looprl/util/pqueue.ml
- __MACOSX/neurips-supplementary/code/looprl/util/._pqueue.ml
- neurips-supplementary/code/looprl/util/random.ml
- __MACOSX/neurips-supplementary/code/looprl/util/._random.ml
- neurips-supplementary/code/looprl/util/fresh.ml
- __MACOSX/neurips-supplementary/code/looprl/util/._fresh.ml
- neurips-supplementary/code/looprl/bin/dune
- __MACOSX/neurips-supplementary/code/looprl/bin/._dune
- neurips-supplementary/code/looprl/bin/pywrap.ml
- __MACOSX/neurips-supplementary/code/looprl/bin/._pywrap.ml
- neurips-supplementary/code/looprl/python/looprl.pyi
- __MACOSX/neurips-supplementary/code/looprl/python/._looprl.pyi
- neurips-supplementary/code/looprl/python/looprl.py
- __MACOSX/neurips-supplementary/code/looprl/python/._looprl.py
- neurips-supplementary/code/benchmarks/code2inv/uninstall.sh
- __MACOSX/neurips-supplementary/code/benchmarks/code2inv/._uninstall.sh
- neurips-supplementary/code/benchmarks/code2inv/parse_bench.py
- __MACOSX/neurips-supplementary/code/benchmarks/code2inv/._parse_bench.py
- neurips-supplementary/code/benchmarks/code2inv/install.sh
- __MACOSX/neurips-supplementary/code/benchmarks/code2inv/._install.sh
- neurips-supplementary/code/benchmarks/code2inv/README.md
- __MACOSX/neurips-supplementary/code/benchmarks/code2inv/._README.md
- neurips-supplementary/code/benchmarks/code2inv/.gitignore
- __MACOSX/neurips-supplementary/code/benchmarks/code2inv/._.gitignore
- neurips-supplementary/code/benchmarks/code2inv/convert_bench.py
- __MACOSX/neurips-supplementary/code/benchmarks/code2inv/._convert_bench.py
- neurips-supplementary/code/looprl_lib/experiments/neurips.py
- __MACOSX/neurips-supplementary/code/looprl_lib/experiments/._neurips.py
- neurips-supplementary/code/looprl_lib/experiments/util/
- __MACOSX/neurips-supplementary/code/looprl_lib/experiments/._util
- neurips-supplementary/code/looprl_lib/experiments/training_curves.py
- __MACOSX/neurips-supplementary/code/looprl_lib/experiments/._training_curves.py
- neurips-supplementary/code/looprl_lib/experiments/__init__.py
- __MACOSX/neurips-supplementary/code/looprl_lib/experiments/.___init__.py
- neurips-supplementary/code/looprl_lib/experiments/search_budget.py
- __MACOSX/neurips-supplementary/code/looprl_lib/experiments/._search_budget.py
- neurips-supplementary/code/looprl_lib/training/session.py
- __MACOSX/neurips-supplementary/code/looprl_lib/training/._session.py
- neurips-supplementary/code/looprl_lib/training/__init__.py
- __MACOSX/neurips-supplementary/code/looprl_lib/training/.___init__.py
- neurips-supplementary/code/looprl_lib/training/dashboard.py
- __MACOSX/neurips-supplementary/code/looprl_lib/training/._dashboard.py
- neurips-supplementary/code/looprl_lib/training/agent.py
- __MACOSX/neurips-supplementary/code/looprl_lib/training/._agent.py
- neurips-supplementary/code/looprl_lib/training/loop.py
- __MACOSX/neurips-supplementary/code/looprl_lib/training/._loop.py
- neurips-supplementary/code/looprl_lib/training/analyze.py
- __MACOSX/neurips-supplementary/code/looprl_lib/training/._analyze.py
- neurips-supplementary/code/looprl_lib/experiments/util/cache_util.py
- __MACOSX/neurips-supplementary/code/looprl_lib/experiments/util/._cache_util.py
- neurips-supplementary/code/looprl_lib/experiments/util/perf_graph.py
- __MACOSX/neurips-supplementary/code/looprl_lib/experiments/util/._perf_graph.py
- neurips-supplementary/code/looprl_lib/experiments/util/__init__.py
- __MACOSX/neurips-supplementary/code/looprl_lib/experiments/util/.___init__.py
