# Supplementary material
Source: ML conference proceedings conference paper supplement (https://proceedings.neurips.cc/paper_files/paper/2022/hash/1f14ac136d55c34a18a04ce3db083599-Abstract.html)
Supplement: Supplementary file 1 [file 1f14ac136d55c34a18a04ce3db083599-Supplemental-Conference.zip › neurips-supplementary/code/benchmarks/code2inv/install.sh]

#!/bin/sh

git clone git@github.com:PL-ML/code2inv.git
mkdir ./benchmarks/code2inv/bench/
mkdir ./benchmarks/code2inv/bench/original
cp code2inv/benchmarks/C_instances/c/* ./benchmarks/code2inv/bench/original
rm ./benchmarks/code2inv/bench/original/test.c
rm -rf code2inv
python benchmarks/code2inv/convert_bench.py
