# Supplementary material
Source: ML conference proceedings conference paper supplement (https://proceedings.neurips.cc/paper_files/paper/2022/hash/1f14ac136d55c34a18a04ce3db083599-Abstract.html)
Supplement: Supplementary file 1 [file 1f14ac136d55c34a18a04ce3db083599-Supplemental-Conference.zip › neurips-supplementary/code/benchmarks/code2inv/README.md]

# Code2Inv Benchmark

Benchmark for linear invariant generation from the Code2Inv paper:
https://github.com/PL-ML/code2inv/tree/master/benchmarks

In order to download and convert the benchmark, you can run the following:

```sh
sh benchmarks/code2inv/install.sh
```
