# Supplementary material
Source: ML conference proceedings conference paper supplement (https://proceedings.neurips.cc/paper_files/paper/2022/hash/1f14ac136d55c34a18a04ce3db083599-Abstract.html)
Supplement: Supplementary file 1 [file 1f14ac136d55c34a18a04ce3db083599-Supplemental-Conference.zip › neurips-supplementary/code/clean.sh]

#!/bin/sh
rm -rf _build .mypy_cache .pytest_cache
find . | grep -E "__pycache__" | xargs rm -rf
