# Supplementary material
Source: ML conference proceedings conference paper supplement (https://proceedings.neurips.cc/paper_files/paper/2022/hash/1f14ac136d55c34a18a04ce3db083599-Abstract.html)
Supplement: Supplementary file 1 [file 1f14ac136d55c34a18a04ce3db083599-Supplemental-Conference.zip › neurips-supplementary/code/looprl/bin/dune]

(executable
  (name pywrap)
  (modules pywrap)
  (preprocess
    (pps ppx_deriving.eq ppx_jane ppx_let ppx_python ppx_deriving.show))
  (libraries base looprl pyml pythonlib)
  (flags :standard -linkall)
  (modes (native shared_object)))
