# Supplementary material
Source: ML conference proceedings conference paper supplement (https://proceedings.neurips.cc/paper_files/paper/2022/hash/1f14ac136d55c34a18a04ce3db083599-Abstract.html)
Supplement: Supplementary file 1 [file 1f14ac136d55c34a18a04ce3db083599-Supplemental-Conference.zip › neurips-supplementary/code/looprl/dune]

(library
  (name looprl)
  (preprocess (pps
    sedlex.ppx
    ppx_jane ppx_let ppx_python
    ppx_deriving.eq ppx_deriving.show ppx_deriving.enum))
  (flags (:standard -w -39)) ;; menhir generates 'unused rec flag' errors
  (inline_tests (flags -verbose))
  (libraries util fmt base parsexp pyml pythonlib sedlex menhirLib re lens owl))

(menhir
 (modules parser)
 (flags --explain)
 ;; (infer false) ;; this is sometimes needed for menhir to work with functors
)
