# Supplementary material
Source: ML conference proceedings conference paper supplement (https://proceedings.neurips.cc/paper_files/paper/2022/hash/1f14ac136d55c34a18a04ce3db083599-Abstract.html)
Supplement: Supplementary file 1 [file 1f14ac136d55c34a18a04ce3db083599-Supplemental-Conference.zip › neurips-supplementary/code/looprl/event_intf.ml]

open Base

module type EVENT =
sig
  type outcome [@@deriving enum, show, sexp]
  type event [@@deriving enum, show, sexp]

  val success: outcome
  val default_failure: outcome
  val size_limit_exceeded: outcome

  val outcome_reward: outcome -> float
  val event_reward: event -> float
  val max_event_occurences: event -> int

  val min_success_reward: float
end
