# Supplementary material
Source: ML conference proceedings conference paper supplement (https://proceedings.neurips.cc/paper_files/paper/2022/hash/1f14ac136d55c34a18a04ce3db083599-Abstract.html)
Supplement: Supplementary file 1 [file 1f14ac136d55c34a18a04ce3db083599-Supplemental-Conference.zip › neurips-supplementary/code/looprl/pretraining.mli]

val sample_task: ?random_sigils:bool -> true_false:bool ->
  Util.Random.rng -> Formula.t * Formula.t * Formula.t

module Probe: Graphable.S with type t = Formula.t
module Choice_summary: Graphable.S with type t = Formula.t
