# Supplementary material
Source: ML conference proceedings conference paper supplement (https://proceedings.neurips.cc/paper_files/paper/2022/hash/1f14ac136d55c34a18a04ce3db083599-Abstract.html)
Supplement: Supplementary file 1 [file 1f14ac136d55c34a18a04ce3db083599-Supplemental-Conference.zip › neurips-supplementary/code/looprl/search.mli]

open Search_intf

module Make
  (Probe: sig type t end) (Summary: sig type t end)
  (Event: sig type event type outcome val default_failure: outcome end):
  SEARCH_MONAD with
    type probe := Probe.t and type summary := Summary.t and
    type event := Event.event and type outcome := Event.outcome
