# Supplementary material
Source: ML conference proceedings conference paper supplement (https://proceedings.neurips.cc/paper_files/paper/2022/hash/1f14ac136d55c34a18a04ce3db083599-Abstract.html)
Supplement: Supplementary file 1 [file 1f14ac136d55c34a18a04ce3db083599-Supplemental-Conference.zip › neurips-supplementary/code/looprl/tokenize.mli]

val program : Prog.t -> Token_graph.t
(** Tokenize a program and add the semantic edges. *)

val instr : Prog.instr -> Token_graph.t
(** Tokenize an instruction. *)

val formula : Formula.t -> Token_graph.t
(** Tokenize a formula. *)

val term : Term.t -> Token_graph.t
(** Tokenize a term. *)

val var : string -> Token_graph.t
(** Tokenize a variable. *)

val example_prog: Prog.t
val simple_example_prog: Prog.t
