# Supplementary material
Source: ML conference proceedings conference paper supplement (https://proceedings.neurips.cc/paper_files/paper/2022/hash/1f14ac136d55c34a18a04ce3db083599-Abstract.html)
Supplement: Supplementary file 1 [file 1f14ac136d55c34a18a04ce3db083599-Supplemental-Conference.zip › neurips-supplementary/code/looprl/util/dune]

(library
  (name util)
  (preprocess (pps ppx_jane ppx_deriving.eq ppx_deriving.show ppx_let))
  (inline_tests (flags -verbose))
  (libraries base lens))
