# Supplementary material
Source: ML conference proceedings conference paper supplement (https://proceedings.neurips.cc/paper_files/paper/2022/hash/1f14ac136d55c34a18a04ce3db083599-Abstract.html)
Supplement: Supplementary file 1 [file 1f14ac136d55c34a18a04ce3db083599-Supplemental-Conference.zip › neurips-supplementary/code/looprl/util/math.ml]

open Base

(* Always return a nonnegative number. *)
(* Only return 0 if both are zero. *)
let rec gcd a b =
  if a = Int.min_value || b = Int.min_value then assert false
  else if a < 0 then gcd (-a) b
  else if b < 0 then gcd a (-b)
  else if a = 0 then b
  else if b = 0 then a
  else if a > b then gcd b (a % b)
  else gcd a (b % a)

let lcm a b =
  let d = gcd a b in
  if d = 0 then 0 else (a * b) / d
