# Supplementary material
Source: ML conference proceedings conference paper supplement (https://proceedings.neurips.cc/paper_files/paper/2022/hash/1f14ac136d55c34a18a04ce3db083599-Abstract.html)
Supplement: Supplementary file 1 [file 1f14ac136d55c34a18a04ce3db083599-Supplemental-Conference.zip › neurips-supplementary/code/looprl/util/names.ml]

open Base

(* Convert a string such as 'Tokenizer.MY_TOKEN' into 'my-token' *)
(* This is useful for changing the default behavior of ppx_show *)
let transform_ppx_enum_name s =
  String.lowercase s
  |> String.substr_replace_all ~pattern:"_" ~with_:"-"
  |> String.split_on_chars ~on:['.']
  |> List.last_exn
