# Supplementary material
Source: ML conference proceedings conference paper supplement (https://proceedings.neurips.cc/paper_files/paper/2022/hash/1f14ac136d55c34a18a04ce3db083599-Abstract.html)
Supplement: Supplementary file 1 [file 1f14ac136d55c34a18a04ce3db083599-Supplemental-Conference.zip › neurips-supplementary/code/looprl/util/pqueue.mli]

type cost = int

type 'a t

val empty: 'a t

val is_empty: 'a t -> bool

val singleton: cost -> 'a -> 'a t

val insert: 'a t -> cost -> 'a -> 'a t

val extract: 'a t -> cost * 'a * 'a t

val size: 'a t -> int

exception Queue_is_empty
