# Supplementary material
Source: ML conference proceedings conference paper supplement (https://proceedings.neurips.cc/paper_files/paper/2022/hash/1f14ac136d55c34a18a04ce3db083599-Abstract.html)
Supplement: Supplementary file 1 [file 1f14ac136d55c34a18a04ce3db083599-Supplemental-Conference.zip › neurips-supplementary/code/looprl/util/random.mli]

type rng = Base.Random.State.t

val shuffle_array : rng -> 'a array -> unit
val shuffle : rng -> 'a list -> 'a list
val sample_subset: rng -> 'a list -> 'a list
val pick: rng -> 'a list -> 'a

type 'a distr
val make_distr : ('a * float) list -> 'a distr
val sample : 'a distr -> rng -> 'a
val bernouilli : ?p:float -> rng -> bool

val filtered : ('a -> bool) -> (rng -> 'a) -> (rng -> 'a)
