# Supplementary material
Source: ML conference proceedings conference paper supplement (https://proceedings.neurips.cc/paper_files/paper/2022/hash/1f14ac136d55c34a18a04ce3db083599-Abstract.html)
Supplement: Supplementary file 1 [file 1f14ac136d55c34a18a04ce3db083599-Supplemental-Conference.zip › neurips-supplementary/code/looprl/var.mli]

type kind = Var | Var_hole | Meta_var | Param
val make : kind -> string -> string
val has_kind : kind -> string -> bool
val kind: string -> kind
val base_name: string -> string
val decompose : string -> kind * string
