# Supplementary material
Source: ML conference proceedings conference paper supplement (https://proceedings.neurips.cc/paper_files/paper/2022/hash/1f14ac136d55c34a18a04ce3db083599-Abstract.html)
Supplement: Supplementary file 1 [file 1f14ac136d55c34a18a04ce3db083599-Supplemental-Conference.zip › neurips-supplementary/code/looprl_lib/experiments/util/cache_util.py]

import os
import pickle
from typing import Callable, TypeVar

T = TypeVar("T")


def cached(file: str, make_data: Callable[[], T]) -> T:
    if os.path.isfile(file):
        with open(file, 'rb') as f:
            return pickle.load(f)
    else:
        data = make_data()
        os.makedirs(os.path.dirname(file), exist_ok=True)
        with open(file, 'wb') as f:
            pickle.dump(data, f)
        return data
