# Supplementary material
Source: ML conference proceedings conference paper supplement (https://proceedings.neurips.cc/paper_files/paper/2022/hash/1f14ac136d55c34a18a04ce3db083599-Abstract.html)
Supplement: Supplementary file 1 [file 1f14ac136d55c34a18a04ce3db083599-Supplemental-Conference.zip › neurips-supplementary/code/requirements.txt]

altair==4.2.0
ansi==0.2.0
async_timeout==4.0.2
dataclasses_json==0.5.6
matplotlib==3.4.3
numpy==1.20.3
pandas==1.3.4
prompt_toolkit==3.0.20
psutil==5.8.0
ray==1.9.2
scipy==1.7.1
sexpdata==0.0.3
streamlit==1.5.0
torch==1.10.1
torch_scatter==2.0.9
tqdm==4.62.3
